# Supplementary material for: Identification of Critical Locations for Improvement of Air Quality Developing a Prioritized Clean Air Assessment Tool (PCAT)
Source: MDPI journal article supplement (doi:10.3390/urbansci7030075), 2023-07-14
Supplement: s1 [file s1]

---

## SUPPLEMENTARY MATERIAL

### for “**Identification of critical locations for improvement of air quality developing a Prioritized Clean air Assessment Tool (PCAT)**”

Kanishtha Dubey<sup>1,\*</sup>, Shubha Verma<sup>1</sup>, Sauvik Santra<sup>1</sup>, Mukul Kumar<sup>2</sup>

<sup>1</sup>Department of Civil Engineering, Indian Institute of Technology Kharagpur, India

<sup>2</sup>Advanced Technology Development Centre Indian Institute of Technology Kharagpur, India

\*Corresponding author at: Department of Civil Engineering, Indian Institute of Technology Kharagpur, India, Email address: kanishthadubey16jan@gmail.com

Table S1 : Details of CPCB monitoring stations considered in the present study  
14 cities spread across the geographical expanse of Indian region constituting urban, sub-urban and rural locations were chosen to effectively represent the pollution scenario of the country.

Table S2 : Break Points of criteria pollutants (PM<sub>10</sub>, PM<sub>2.5</sub>, CO, SO<sub>2</sub>, NO<sub>2</sub>, O<sub>3</sub>) as given by CPCB, India

Table S3 : Seasonal Mean, interquartile range (IQR) and 95<sup>th</sup> percentile values for all the species during winter and summer season.

Table S4 : Fuzzy Membership Functions

The membership functions characterise the fuzziness in the fuzzy set in a graphical form. Table S3 represents the triangular fuzzy membership function equation of six pollutants (SO<sub>2</sub>, CO, NO<sub>2</sub>, PM<sub>10</sub>, PM<sub>2.5</sub> and O<sub>3</sub>) for each of the six linguistic variables.

Table S5 : Estimated National Air Quality Index

Table S5 represents the estimated national air quality index calculated using breakpoint concentrations of six criteria pollutants given by the Central Pollution Control Board (CPCB), India. The concentration of criteria pollutants for 14 Indian cities were obtained from CPCB website.

Table S6 : Estimated Mitigation Priority Index

The developed Prioritised Clean air Assessment Tool (PCAT) was utilised to obtain Mitigation Priority Index (MPI) for 14 Indian cities presented in Table S5.

Table S7 : Comparative study of NAQI and MPI

Table S7 represents the locations considered in the present study, the site type, descriptor pollutant while calculating the NAQI and respective category they fall in as obtained from the estimates.

### 1 Check for consistency

In a consistent judgement matrix,  $\lambda_{max} = n$ ,  $n$  is the dimension of the judgement matrix and  $\lambda_{max}$  corresponds to the maximum eigenvalue of the matrix (Saaty, 1980; Saaty and Takizawa, 1986). Consistency index (CI) indicates the consistency of values (judgements) in the pairwise judgement matrix. The CI is defined as,

$$Consistency\ Index\ (CI) = \frac{\lambda_{max} - n}{n - 1} = \frac{6.186 - 6}{6 - 1} = 0.0372 \quad (1)$$

The final consistency check is performed using a parameter called consistency ratio (CR), defined as (Equation:2):

$$Consistency\ Ratio\ (CR) = \frac{Consistency\ Index\ (CI)}{Ratio\ Index\ (RI)} \quad (2)$$

$$= \frac{0.0372}{1.24} = 0.03 \quad (3)$$

Ratio Index (RI) is obtained through averaging the CI of a random reciprocal matrix (Saaty, 1980). The judgement matrix is consistent if the value of CR is found to be less than or equal to 0.1 (Saaty, 2005). A value of CR greater than 0.1 requires reconsideration of the judgements. In the present study CR of the matrix is found to be 0.03 which is well below the threshold value of 0.1. Final pairwise judgement matrix with sufficient consistency level is considered for calculation of the weights. Eigenvalue and eigenvector analysis method for calculating the weights are adopted for the purpose. Normalized eigen vectors corresponding to the  $\lambda_{max}$  are considered as weights in this method. In our case, eigen vector corresponding to  $\lambda_{max}$  is denoted as  $\vec{\lambda}_{max}$ .

**Table S1 : Details of CPCB monitoring stations considered in the present study**

| S.NO. | City        | Station Considered                    | Latitude | Longitude |
|-------|-------------|---------------------------------------|----------|-----------|
| 1     | Patna       | IGSC Planetarium Complex, Patna       | 85.137°E | 25.594°N  |
| 2     | Delhi       | Mandir Marg, Delhi                    | 28.637°E | 77.200°N  |
| 3     | Navi Mumbai | Airoli, Navi Mumbai                   | 19.158°E | 72.994°N  |
| 4     | Pune        | Karve Road, Pune                      | 73.816°E | 18.501°N  |
| 5     | Chandrapur  | Chandrapur, Chandrapur                | 19.971°E | 79.303°N  |
| 6     | Solapur     | Solapur, Solapur                      | 75.906°E | 17.659°N  |
| 7     | Jaipur      | Police Commissionerate, Jaipur        | 75.799°E | 26.916°N  |
| 8     | Jodhpur     | Collectorate, Jodhpur                 | 73.037°E | 26.292°N  |
| 9     | Hyderabad   | Zoo Park, Hyderabad                   | 78.451°E | 17.349°N  |
| 10    | Muzaffarpur | Muzaffarpur Collectorate, Muzaffarpur | 85.364°E | 26.120°N  |
| 11    | Kolkata     | Victoria, Kolkata                     | 88.34 °E | 22.544°N  |
| 12    | Varanasi    | Ardhali Bazar, Varanasi               | 82.908°E | 25.350°N  |
| 13    | Bengaluru   | BWSSB Kadabesanahalli, Bengaluru      | 77.698°E | 12.947°N  |
| 14    | Chennai     | Alandur Bus Depot, Chennai            | 80.209°E | 13.007°N  |

**Table S2 : Break Points of criteria pollutants (PM<sub>10</sub>, PM<sub>2.5</sub>, CO, SO<sub>2</sub>, NO<sub>2</sub>, O<sub>3</sub>) as given by CPCB, India**

| NAQI Category (Range)         | PM <sub>10</sub><br>( $\mu\text{g}/\text{m}^3$ ) | PM <sub>2.5</sub><br>( $\mu\text{g}/\text{m}^3$ ) | SO <sub>2</sub><br>( $\mu\text{g}/\text{m}^3$ ) | NO <sub>2</sub><br>( $\mu\text{g}/\text{m}^3$ ) | CO<br>( $\text{mg}/\text{m}^3$ ) | O <sub>3</sub><br>( $\mu\text{g}/\text{m}^3$ ) |
|-------------------------------|--------------------------------------------------|---------------------------------------------------|-------------------------------------------------|-------------------------------------------------|----------------------------------|------------------------------------------------|
| Good (0-50)                   | 0-50                                             | 0-30                                              | 0-40                                            | 0-40                                            | 0-1                              | 0-50                                           |
| Satisfactory (51-100)         | 51-100                                           | 31-60                                             | 41-80                                           | 41-80                                           | 1.1-2.0                          | 51-100                                         |
| Moderately Polluted (101-200) | 101-205                                          | 61-90                                             | 81-380                                          | 81-180                                          | 2.1-10                           | 101-168                                        |
| Poor (201-300)                | 251-350                                          | 91-150                                            | 381-800                                         | 181-280                                         | 10.1-17                          | 169-208                                        |
| Very Poor (301-400)           | 351-430                                          | 151-250                                           | 801-1600                                        | 281-400                                         | 17.1-34                          | 209-748                                        |
| Severe (401-500)              | >430                                             | >250                                              | >1600                                           | >400                                            | >34                              | >748                                           |

---

**Table S3 : Seasonal Mean, interquartile range (IQR) and 95<sup>th</sup> percentile values for all the species during winter and summer season. The values of seasonal mean, IQR and 95<sup>th</sup> percentile for the summer season is given inside brackets. VNS: Varanasi, KOL: Kolkata, MFP: Muzaffarpur, CDR: Chandrapur, SUR: Solapur, JPR: Jaipur, JDR: Jodhpur, HYB: Hyderabad, DEL: Delhi, MUM: Mumbai, PAT: Patna**

| SITE | SO <sub>2</sub> |               |                       | NO <sub>2</sub> |                |                       | CO           |              |                       | O <sub>3</sub> |                |                       | PM <sub>10</sub> |                  |                       | PM <sub>2.5</sub> |                 |                       |
|------|-----------------|---------------|-----------------------|-----------------|----------------|-----------------------|--------------|--------------|-----------------------|----------------|----------------|-----------------------|------------------|------------------|-----------------------|-------------------|-----------------|-----------------------|
|      | Mean            | IQR           | 95 <sup>th</sup><br>% | Mean            | IQR            | 95 <sup>th</sup><br>% | Mean         | IQR          | 95 <sup>th</sup><br>% | Mean           | IQR            | 95 <sup>th</sup><br>% | Mean             | IQR              | 95 <sup>th</sup><br>% | Mean              | IQR             | 95 <sup>th</sup><br>% |
| Pune | 32.1<br>(23.7)  | 24.7<br>(2.6) | 45.0<br>(46.0)        | 50.4<br>(40.2)  | 38.6<br>(4.4)  | 75.1<br>(27.0)        | 2.3<br>(2.2) | 1.4<br>(0.5) | 6.2<br>(2.8)          | 12.0<br>(17.4) | 8.6<br>(5.9)   | 13.3<br>(27.8)        | 171.1<br>(90.3)  | 70.1<br>(26.5)   | 261.7<br>(154.3)      | 108.3<br>(62.0)   | 40.9<br>(31.4)  | 186.1<br>(114.5)      |
| VNS  | 32.1<br>(5.5)   | 38.1<br>(5.2) | 69.6<br>(38.0)        | 31.9<br>(24.7)  | 9.7<br>(14.1)  | 44.0<br>(11.4)        | 1.6<br>(1.1) | 1.0<br>(0.9) | 3.3<br>(2.7)          | 16.2<br>(22.5) | 10.0<br>(10.7) | 41.3<br>(25.4)        | 395.7<br>(306.6) | 152.9<br>(156.1) | 460.7<br>(437.7)      | 288.6<br>(116.8)  | 119.5<br>(63.1) | 418.6<br>(234.3)      |
| KOL  | 5.0             | 0.9           | 6.1                   | 75.5            | 27.3           | 119.0                 | 1.2          |              | 6.1                   | 35.3           |                | 41.7                  | 140.1            |                  |                       |                   |                 |                       |
| MFP  | 11.2<br>(8.4)   | 6.0<br>(5.1)  | 18.6<br>(22.1)        | 10.8<br>(10.0)  | 13.0<br>(13.0) | 22.7<br>(23.9)        | 1.8<br>(1.4) | 1.2<br>(0.4) | 3.2<br>(3.6)          | 21.8<br>(14.2) | 7.4<br>(8.4)   | 33.6<br>(30.5)        |                  |                  |                       | 258.5<br>(85.8)   | 142.5<br>(55.5) | 319.7<br>(181.2)      |
| CDR  | 5.1<br>(6.8)    | 2.1<br>(3.6)  | 11.8<br>(10.0)        | 14.4<br>(5.0)   | 18.7<br>(3.4)  | 29.9<br>(18.1)        | 0.9<br>(0.6) | 0.4<br>(0.3) | 1.6<br>(1.1)          | 22.9<br>(11.2) | 7.8<br>(9.1)   | 41.0<br>(23.0)        | 154.0<br>(127.4) | 60.1<br>(66.2)   | 233.1<br>(214.6)      | 71.0<br>(56.1)    | 25.8<br>(32.0)  | 126.0<br>(109.1)      |
| SUR  | 16.9<br>(12.0)  | 1.4<br>(1.3)  | 18.6<br>(46.9)        | 39.5<br>(41.2)  | 3.3<br>(6.9)   | 49.8<br>(14.1)        | 2.1<br>(2.2) | 1.2<br>(0.8) | 3.4<br>(3.2)          | 47.8<br>(67.4) | 19.9<br>(27.8) | 87.8<br>(101.5)       | 109.1<br>(101.4) | 48.9<br>(40.5)   | 193.2<br>(155.8)      | 55.2<br>(38.3)    | 18.5<br>(17.2)  | 77.1<br>(59.7)        |
| JPR  | 11.4<br>(13.0)  | 5.3<br>(6.3)  | 22.0<br>(31.4)        | 37.4<br>(21.9)  | 9.9<br>(6.3)   | 49.3<br>(25.9)        | 0.8<br>(0.7) | 0.1<br>(0.3) | 1.2<br>(1.7)          | 18.2<br>(53.3) | 30.9<br>(13.8) | 47.0<br>(108.0)       | 261.4<br>(215.6) | 58.8<br>(77.0)   | 284.4<br>(315.3)      | 171.9<br>(90.1)   | 54.3<br>(49.6)  | 228.7<br>(169.1)      |
| JDR  | 9.6<br>(8.2)    | 6.5<br>(3.0)  | 18.7<br>(37.1)        | 35.5<br>(21.8)  | 14.9<br>(4.2)  | 65.8<br>(18.2)        | 1.0<br>(0.7) | 0.6<br>(0.4) | 3.6<br>(1.9)          | 27.8<br>(28.4) | 15.4<br>(16.2) | 54.5<br>(49.0)        | 293.0<br>(234.8) | 117.1<br>(70.8)  | 358.7<br>(438.1)      | 121.4<br>(97.5)   | 54.4<br>(29.0)  | 204.8<br>(239.5)      |
| HYB  | 11.5<br>(5.8)   | 3.0<br>(2.2)  | 16.8<br>(64.8)        | 2.3<br>(19.4)   | 0.8<br>(40.9)  | 3.9<br>(11.6)         | 1.0<br>(1.0) | 0.6<br>(0.5) | 2.0<br>(1.6)          | 41.3<br>(33.1) | 22.3<br>(26.7) | 95.5<br>(79.6)        | 100.7<br>(88.3)  | 10.3<br>(23.6)   | 115.8<br>(110.2)      | 56.8<br>(43.8)    | 22.2<br>(23.5)  | 74.5<br>(65.1)        |
| DEL  | 19.8<br>(23.1)  | 8.4<br>(11.5) | 31.3<br>(84.7)        | 80.3<br>(50.7)  | 36.3<br>(22.5) | 126.8<br>(44.4)       | 1.8<br>(1.0) | 1.2<br>(0.5) | 3.1<br>(1.6)          | 44.7<br>(36.5) | 25.0<br>(26.9) | 129.6<br>(75.5)       | 344.8<br>(201.2) | 93.2<br>(98.5)   | 538.3<br>(349.3)      | 215.6<br>(63.1)   | 79.2<br>(30.8)  | 325.2<br>(125.2)      |
| MUM  | 24.9<br>(36.8)  | 17.6<br>(6.3) | 38.0                  | 19.3            |                | (48.1)                | 3.3<br>(1.9) | 1.3<br>(0.5) | 5.7<br>(2.6)          | 31.5           |                |                       | 89.8<br>(71.7)   | 13.6<br>(25.4)   | 116.2<br>(115.9)      | 36.7<br>(42.2)    | 8.6<br>(18.3)   | 43.6<br>(70.9)        |
| PAT  | 7.9<br>(6.8)    | 2.2<br>(2.9)  | 24.0<br>(30.2)        | 35.4<br>(15.9)  | 10.8<br>(10.9) | 44.7<br>(16.4)        | 2.5<br>(1.4) | 1.5<br>(1.2) | 6.1<br>(3.0)          | 15.7<br>(24.0) | 12.8<br>(17.2) | 41.7<br>(50.7)        | 135.3            |                  |                       | 324.2<br>(99.4)   | 133.6<br>(47.4) | 359.2<br>(226.9)      |

Table S4 : Fuzzy Membership Functions

| Pollutant                                | Range of variation  | Membership function distribution |                             |                             |                             |                             |                               |
|------------------------------------------|---------------------|----------------------------------|-----------------------------|-----------------------------|-----------------------------|-----------------------------|-------------------------------|
|                                          |                     | Good                             | Monitoring for Mitigation   | Mitigation                  | Desired Mitigation          | Urgent Mitigation           | Very Urgent Mitigation        |
| $\text{SO}_2$ ( $\mu\text{gm}^{-3}$ )    | $< 20$              | 1                                | 0                           | 0                           | 0                           | 0                           | 0                             |
|                                          | $20 \leq x < 40$    | $\frac{40-x}{40-20}$             | $1 - \frac{40-x}{40-20}$    | 0                           | 0                           | 0                           | 0                             |
|                                          | $40 \leq x < 80$    | 0                                | $\frac{80-x}{80-40}$        | $1 - \frac{80-x}{80-40}$    | 0                           | 0                           | 0                             |
|                                          | $80 \leq x < 380$   | 0                                | 0                           | $\frac{380-x}{380-80}$      | $1 - \frac{380-x}{380-80}$  | 0                           | 0                             |
|                                          | $380 \leq x < 800$  | 0                                | 0                           | 0                           | $\frac{800-x}{800-380}$     | $1 - \frac{800-x}{800-380}$ | 0                             |
|                                          | $800 \leq x < 1600$ | 0                                | 0                           | 0                           | 0                           | $\frac{1600-x}{1600-800}$   | $1 - \frac{1600-x}{1600-800}$ |
| $\text{CO}$ ( $\text{mgm}^{-3}$ )        | $\geq 1600$         | 0                                | 0                           | 0                           | 0                           | 0                           | 1                             |
|                                          | $< 0.5$             | 1                                | 0                           | 0                           | 0                           | 0                           | 0                             |
|                                          | $0.5 \leq x < 1.0$  | $\frac{1.0-x}{1.0-0.5}$          | $1 - \frac{1.0-x}{1.0-0.5}$ | 0                           | 0                           | 0                           | 0                             |
|                                          | $1.0 \leq x < 2.0$  | 0                                | $\frac{2.0-x}{2.0-1.0}$     | $1 - \frac{2.0-x}{2.0-1.0}$ | 0                           | 0                           | 0                             |
|                                          | $2.0 \leq x < 10$   | 0                                | 0                           | $\frac{10-x}{10-2.0}$       | $1 - \frac{10-x}{10-2.0}$   | 0                           | 0                             |
|                                          | $10 \leq x < 17$    | 0                                | 0                           | 0                           | $\frac{17-x}{17-10}$        | $1 - \frac{17-x}{17-10}$    | 0                             |
|                                          | $17 \leq x < 34$    | 0                                | 0                           | 0                           | 0                           | $\frac{34-x}{34-17}$        | $1 - \frac{34-x}{34-17}$      |
|                                          | $\geq 34$           | 0                                | 0                           | 0                           | 0                           | 0                           | 1                             |
|                                          | $< 25$              | 1                                | 0                           | 0                           | 0                           | 0                           | 0                             |
|                                          | $25 \leq x < 50$    | $\frac{50-x}{50-25}$             | $1 - \frac{50-x}{50-25}$    | 0                           | 0                           | 0                           | 0                             |
|                                          | $50 \leq x < 100$   | 0                                | $\frac{100-x}{100-50}$      | $1 - \frac{100-x}{100-50}$  | 0                           | 0                           | 0                             |
| $\text{PM}_{10}$ ( $\mu\text{gm}^{-3}$ ) | $100 \leq x < 250$  | 0                                | 0                           | $\frac{250-x}{250-100}$     | $1 - \frac{250-x}{250-100}$ | 0                           | 0                             |
|                                          | $250 \leq x < 350$  | 0                                | 0                           | 0                           | $\frac{350-x}{350-250}$     | $1 - \frac{350-x}{350-250}$ | 0                             |
|                                          | $350 \leq x < 430$  | 0                                | 0                           | 0                           | 0                           | $\frac{430-x}{430-350}$     | $1 - \frac{430-x}{430-350}$   |
|                                          | $\geq 430$          | 0                                | 0                           | 0                           | 0                           | 0                           | 1                             |

| Pollutant                             | Range of variation | Membership function distribution |                           |                            |                             |                             |                             |
|---------------------------------------|--------------------|----------------------------------|---------------------------|----------------------------|-----------------------------|-----------------------------|-----------------------------|
|                                       |                    | Good                             | Monitoring for Mitigation | Mitigation                 | Desired Mitigation          | Urgent Mitigation           | Very Urgent Mitigation      |
| $\text{PM}_{2.5} (\mu\text{gm}^{-3})$ | $< 15$             | 1                                | 0                         | 0                          | 0                           | 0                           | 0                           |
|                                       | $15 \leq x < 30$   | $\frac{30-x}{30-15}$             | $1 - \frac{30-x}{30-15}$  | 0                          | 0                           | 0                           | 0                           |
|                                       | $30 \leq x < 60$   | 0                                | $\frac{60-x}{60-30}$      | $1 - \frac{60-x}{60-30}$   | 0                           | 0                           | 0                           |
|                                       | $60 \leq x < 90$   | 0                                | 0                         | $\frac{90-x}{90-60}$       | $1 - \frac{90-x}{90-60}$    | 0                           | 0                           |
|                                       | $90 \leq x < 120$  | 0                                | 0                         | 0                          | $\frac{120-x}{120-90}$      | $1 - \frac{120-x}{120-90}$  | 0                           |
|                                       | $120 \leq x < 250$ | 0                                | 0                         | 0                          | 0                           | $\frac{250-x}{250-120}$     | $1 - \frac{250-x}{250-120}$ |
|                                       | $\geq 250$         | 0                                | 0                         | 0                          | 0                           | 0                           | 1                           |
|                                       | $< 20$             | 1                                | 0                         | 0                          | 0                           | 0                           | 0                           |
| $\text{NO}_2 (\mu\text{gm}^{-3})$     | $20 \leq x < 40$   | $\frac{40-x}{40-20}$             | $1 - \frac{40-x}{40-20}$  | 0                          | 0                           | 0                           | 0                           |
|                                       | $40 \leq x < 80$   | 0                                | $\frac{80-x}{80-40}$      | $1 - \frac{80-x}{80-40}$   | 0                           | 0                           | 0                           |
|                                       | $80 \leq x < 180$  | 0                                | 0                         | $\frac{180-x}{180-80}$     | $1 - \frac{180-x}{180-80}$  | 0                           | 0                           |
|                                       | $180 \leq x < 280$ | 0                                | 0                         | 0                          | $\frac{280-x}{280-180}$     | $1 - \frac{280-x}{280-180}$ | 0                           |
|                                       | $280 \leq x < 400$ | 0                                | 0                         | 0                          | 0                           | $\frac{400-x}{400-280}$     | $1 - \frac{400-x}{400-280}$ |
|                                       | $\geq 400$         | 0                                | 0                         | 0                          | 0                           | 0                           | 1                           |
|                                       | $< 25$             | 1                                | 0                         | 0                          | 0                           | 0                           | 0                           |
|                                       | $25 \leq x < 50$   | $\frac{50-x}{50-25}$             | $1 - \frac{50-x}{50-25}$  | 0                          | 0                           | 0                           | 0                           |
| $\text{O}_3 (\mu\text{gm}^{-3})$      | $50 \leq x < 100$  | 0                                | $\frac{100-x}{100-50}$    | $1 - \frac{100-x}{100-50}$ | 0                           | 0                           | 0                           |
|                                       | $100 \leq x < 168$ | 0                                | 0                         | $\frac{168-x}{168-100}$    | $1 - \frac{168-x}{168-100}$ | 0                           | 0                           |
|                                       | $168 \leq x < 208$ | 0                                | 0                         | 0                          | $\frac{208-x}{208-168}$     | $1 - \frac{208-x}{208-168}$ | 0                           |
|                                       | $208 \leq x < 748$ | 0                                | 0                         | 0                          | 0                           | $\frac{748-x}{748-208}$     | $1 - \frac{748-x}{748-208}$ |
|                                       | $\geq 748$         | 0                                | 0                         | 0                          | 0                           | 0                           | 1                           |
|                                       |                    |                                  |                           |                            |                             |                             |                             |

**Table S5 : Estimated National Air Quality Index**

| Station     | Nov 2015 | Category            | Dec 2015 | Category            | Jan 2016 | Category            | March 2016 | Category            | April 2016 | Category            | May 2016 | Category            |
|-------------|----------|---------------------|----------|---------------------|----------|---------------------|------------|---------------------|------------|---------------------|----------|---------------------|
| Patna       | 279      | Poor                | 328      | Very Poor           | 346      | Very Poor           | 308        | Very Poor           | 161        | Moderately Polluted | 192      | Moderately Polluted |
| Delhi       | 376      | Very Poor           | 360      | Very Poor           | 383      | Very Poor           | 146        | Moderately Polluted | 194        | Moderately Polluted | 162      | Moderately Polluted |
| Mumbai      | 110      | Moderately Polluted | 122      | Moderately Polluted | 115      | Moderately Polluted | 99         | Satisfactory        | 100        | Satisfactory        | 75       | Satisfactory        |
| Pune        | 282      | Poor                | 262      | Poor                | 229      | Poor                | 165        | Moderately Polluted | 105        | Moderately Polluted | 78       | Satisfactory        |
| Chandrapur  | 148      | Moderately Polluted | 149      | Moderately Polluted | 127      | Moderately Polluted | 126        | Moderately Polluted | 127        | Moderately Polluted | 102      | Moderately Polluted |
| Solapur     | 110      | Moderately Polluted | 117      | Moderately Polluted | 139      | Moderately Polluted | 114        | Moderately Polluted | 105        | Moderately Polluted | 105      | Moderately Polluted |
| Jaipur      | 347      | Very Poor           | 345      | Very Poor           | 328      | Very Poor           | 181        | Moderately Polluted | 218        | Poor                | 209      | Poor                |
| Jodhpur     | 212      | Poor                | 320      | Very Poor           | 311      | Very Poor           | 142        | Moderately Polluted | 166        | Moderately Polluted | 314      | Very Poor           |
| Hyderabad   | 103      | Moderately Polluted | 94       | Satisfactory        | 115      | Moderately Polluted | 96         | Satisfactory        | 94         | Satisfactory        | 72       | Satisfactory        |
| Muzaffarpur | 375      | Very Poor           | 259      | Poor                | 288      | Poor                | 282        | Poor                | 234        | Poor                | 82       | Satisfactory        |
| Kolkata     | 140      | Moderately Polluted | 117      | Moderately Polluted | 123      | Moderately Polluted | -          | -                   | -          | -                   | -        | -                   |
| Varanasi    | 351      | Very Poor           | 394      | Very Poor           | 447      | Severe              | 345        | Very Poor           | 275        | Poor                | 211      | Poor                |
| Bengaluru   | 46       | Good                | 63       | Satisfactory        | 100      | Satisfactory        | 103        | Satisfactory        | 90         | Satisfactory        | 92       | Satisfactory        |
| Chennai     | 99       | Satisfactory        | 123      | Moderately Polluted | 182      | Moderately Polluted | 52         | Satisfactory        | 71         | Satisfactory        | 58       | Satisfactory        |



Table S6 : Estimated Mitigation Priority Index

| Station     | Nov<br>2015 | Category | Dec<br>2015 | Category | Jan<br>2016 | Category | March<br>2016 | Category | April<br>2016 | Category | May<br>2016 | Category |
|-------------|-------------|----------|-------------|----------|-------------|----------|---------------|----------|---------------|----------|-------------|----------|
| Patna       | 2.75        | M        | 2.77        | M        | 2.72        | M        | 1.9           | MM       | 1.63          | MM       | 1.69        | MM       |
| Delhi       | 3.42        | M        | 3.2         | M        | 3.33        | M        | 2.69          | M        | 2.91          | M        | 2.6         | M        |
| Mumbai      | 1.82        | MM       | 1.88        | MM       | 1.89        | MM       | 2.13          | MM       | 1.91          | MM       | 1.9         | MM       |
| Pune        | 2.72        | M        | 2.67        | M        | 2.33        | M        | 2.5           | MM       | 2.41          | MM       | 2.17        | MM       |
| Chandrapur  | 1.98        | MM       | 1.98        | MM       | 1.96        | MM       | 2.3           | MM       | 2.3           | MM       | 2.06        | MM       |
| Solapur     | 1.68        | MM       | 2.33        | MM       | 2.42        | MM       | 2.68          | M        | 2.14          | MM       | 2.47        | MM       |
| Jaipur      | 2.73        | M        | 2.64        | M        | 2.47        | M        | 2.68          | M        | 2.14          | MM       | 2.47        | MM       |
| Jodhpur     | 2.4         | MM       | 2.79        | MM       | 2.57        | M        | 2.57          | M        | 2.57          | M        | 2.92        | M        |
| Hyderabad   | 1.97        | MM       | 1.88        | MM       | 2.22        | MM       | 2.23          | MM       | 2.13          | MM       | 1.68        | MM       |
| Muzaffarpur | 2.18        | MM       | 2.29        | MM       | 2.27        | MM       | 1.77          | MM       | 1.77          | MM       | 1.44        | MM       |
| Kolkata     | 1.87        | MM       | 1.79        | MM       | 1.81        | MM       | -             | -        | -             | -        | -           | -        |
| Varanasi    | 2.81        | M        | 3.08        | M        | 3.26        | M        | 3.72          | DM       | 2.81          | M        | 2.67        | M        |
| Bengaluru   | 1.43        | G        | 1.34        | G        | 1.54        | G        | 1.6           | MM       | 1.52          | MM       | 1.67        | MM       |
| Chennai     | 1.56        | MM       | 1.63        | MM       | 2.06        | MM       | 1.67          | MM       | 1.67          | MM       | 1.59        | MM       |

VUM: Very urgent mitigation  
 UM: Urgent mitigation  
 DM: Desired mitigation  
 M: Mitigation  
 MM: Monitoring for mitigation  
 G: Good

**Table S7 : Comparative study of NAQI and MPI**

| Location    | Area         | Descriptive Pollutant                     | NAQI Category       | MPI Category              |
|-------------|--------------|-------------------------------------------|---------------------|---------------------------|
| Pune        | Metropolitan | PM <sub>10</sub> , PM <sub>2.5</sub> , CO | Moderately Polluted | Monitoring for mitigation |
| Patna       | Metropolitan | PM <sub>2.5</sub>                         | Poor                | Monitoring for mitigation |
| Chandrapur  | Urban        | PM <sub>10</sub> , PM <sub>2.5</sub>      | Moderately Polluted | Monitoring for mitigation |
| Solapur     | Urban        | PM <sub>10</sub> , CO                     | Moderately Polluted | Monitoring for mitigation |
| Mumbai      | Megacity     | CO                                        | Moderately Polluted | Monitoring for mitigation |
| Jaipur      | Metropolitan | PM <sub>10</sub> , PM <sub>2.5</sub>      | Poor                | Mitigation                |
| Jodhpur     | Metropolitan | PM <sub>10</sub> , PM <sub>2.5</sub>      | Poor                | Mitigation                |
| Muzaffarpur | Urban        | PM <sub>10</sub> , PM <sub>2.5</sub>      | Poor                | Monitoring for mitigation |
| Kolkata     | Megacity     | PM <sub>10</sub>                          | Moderately Polluted | Monitoring for mitigation |
| Hyderabad   | Metropolitan | PM <sub>10</sub> , PM <sub>2.5</sub>      | Satisfactory        | Monitoring for mitigation |
| Varanasi    | Metropolitan | PM <sub>10</sub> , PM <sub>2.5</sub>      | Very Poor           | Mitigation                |
| Delhi       | Megacity     | PM <sub>10</sub> , PM <sub>2.5</sub>      | Poor                | Mitigation                |
| Bengaluru   | Metropolitan | PM <sub>2.5</sub>                         | Satisfactory        | Good                      |
| Chennai     | Metropolitan | PM <sub>2.5</sub>                         | Satisfactory        | Monitoring for mitigation |

### References

- Saaty TL (1980) The Analytical Hierarchy Process, Planning, Priority. Resource Allocation RWS Publications, USA
- Saaty TL (2005) The analytic hierarchy and analytic network processes for the measurement of intangible criteria and for decision-making. In: Multiple criteria decision analysis: state of the art surveys, Springer, pp 345–405
- Saaty TL, Takizawa M (1986) Dependence and independence: From linear hierarchies to non-linear networks. European journal of operational research 26(2):229–237
